# Supplementary material for: Spherical TiO2 aggregates with different building units for dye-sensitized solar cells
Source: Royal Society of Chemistry journal article supplement (doi:10.1039/c3nr01767b), 2013-01-01
Supplement: c3nr01767b.pdf [file c3nr01767b.pdf]

## Supporting Information

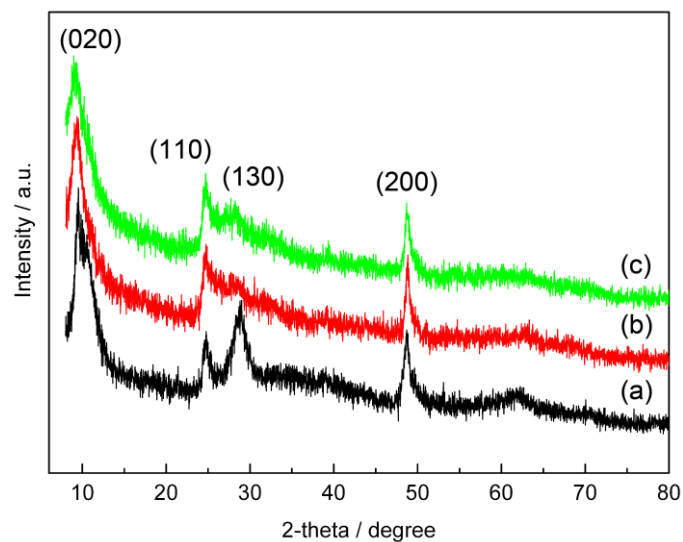

**Figure S1.** X-ray diffraction pattern of spherical titanate aggregates with different building units: (a) nanoparticles, (b) nanosheets, and (c) nanotubes.

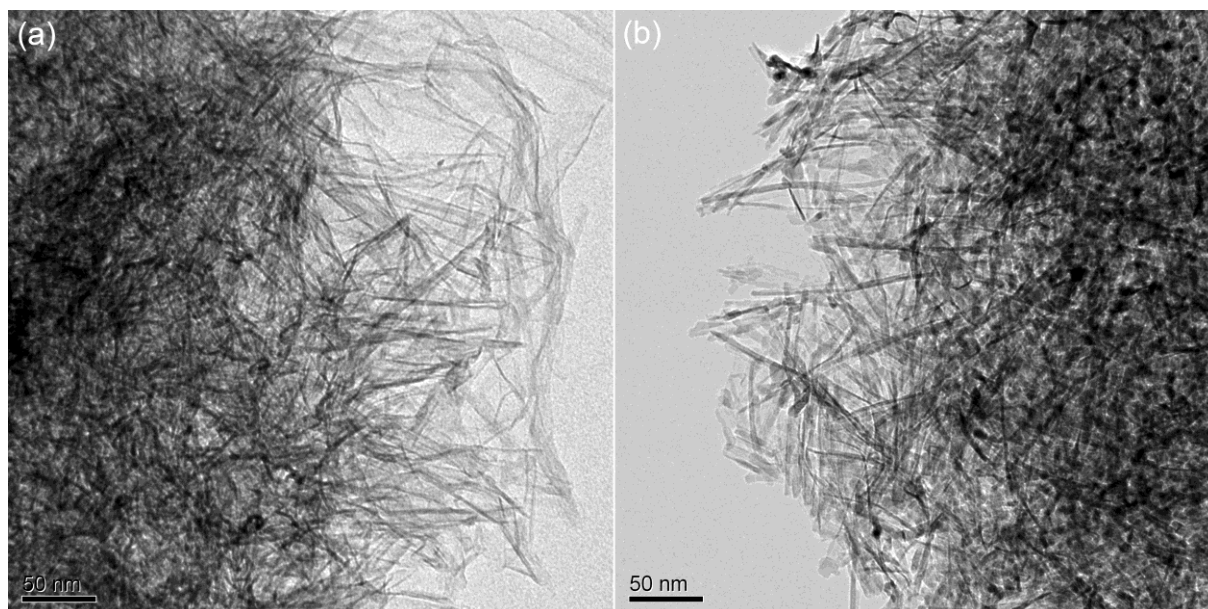

**Figure S2.** TEM images of spherical  $\text{TiO}_2$  aggregates annealing at 450 °C for 30 min.

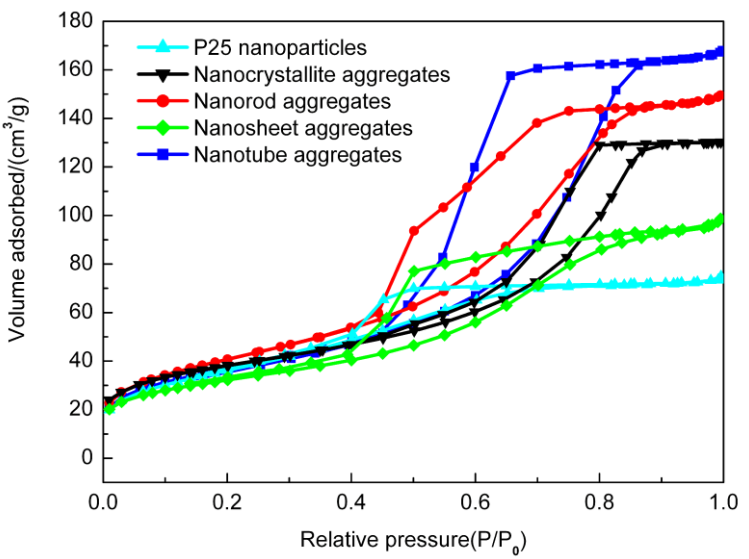

**Figure S3.** N<sub>2</sub> adsorption-desorption isotherms of spherical TiO<sub>2</sub> aggregates at 77 K

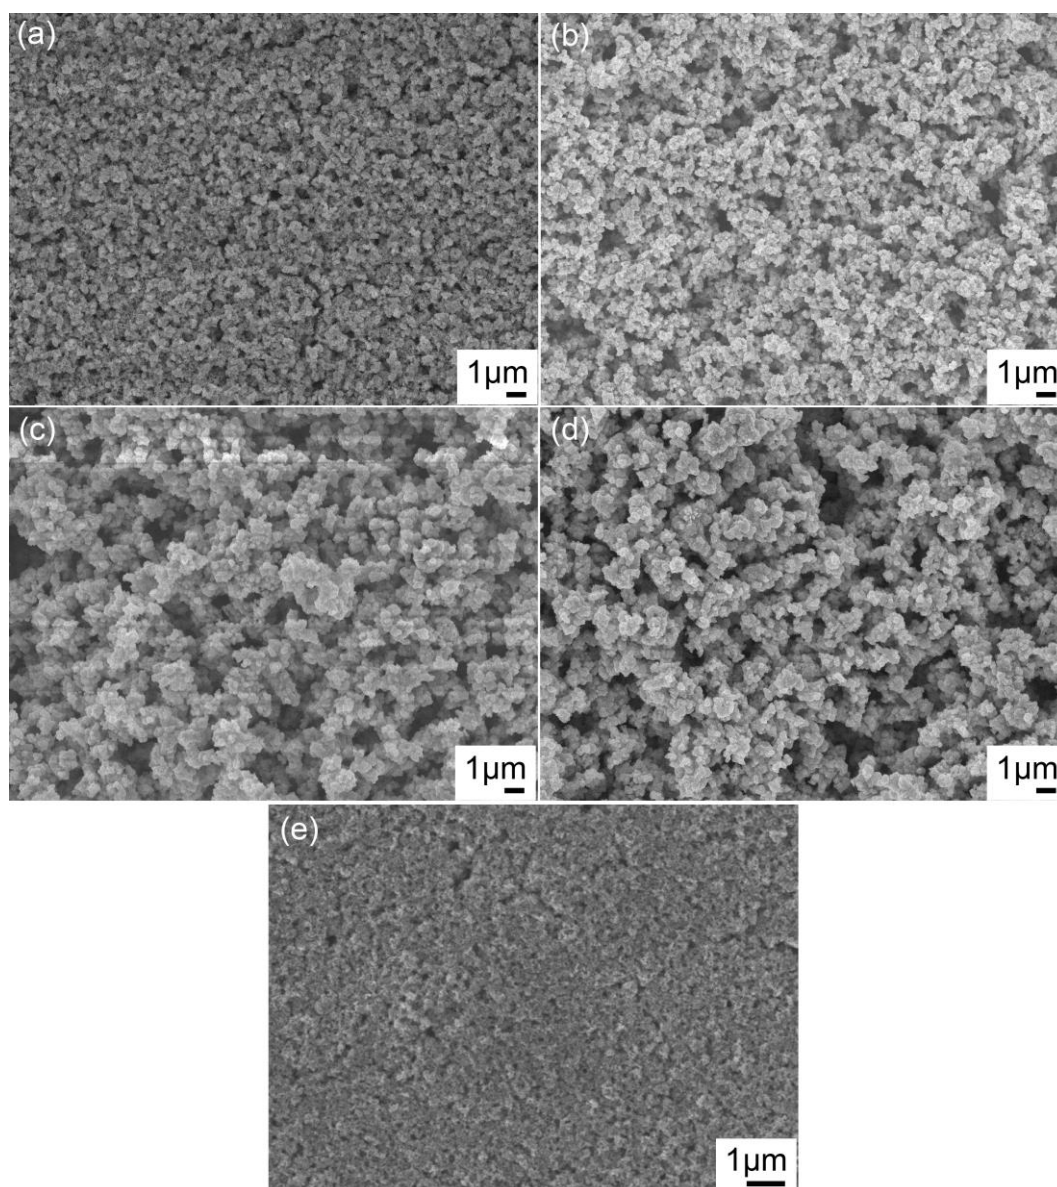

**Figure S4.** SEM images of photoelectrode films (a) nanocrystallite aggregates, (b) nanorod aggregates, (c) nanosheet aggregates, (d) nanotube aggregates, and (e) P25 nanoparticles
